# Supplementary material
Source: HighWire-hosted journal article supplement (https://ajnr-sso.highwirestaging.com/highwire/filestream/98539/field_highwire_adjunct_files/0/0229.pdf)
Supplement: 0229.pdf [file 0229.pdf]

Online supplement - **Causes of death in endovascularly treated acute stroke patients**

**Table 1:** Time between stroke onset and death depending on cause of death.

| Cause of death       | Onset to death - all<br>(n=326) [median days] | Onset to death - curative<br>(n=37) [median days] | Onset to death – secondary<br>palliative (n=289) [median<br>days] | P-value (curative vs.<br>secondary palliative) |
|----------------------|-----------------------------------------------|---------------------------------------------------|-------------------------------------------------------------------|------------------------------------------------|
| Cerebrovascular      | 4 (IQR, 2-8)                                  | 2.5 (IQR, 1-3.75)                                 | 4 (IQR, 2-8)                                                      | 0.016*                                         |
| Pneumonia,<br>sepsis | 11 (IQR, 4-17)                                | 3 (IQR, 2.5-24.5)                                 | 12 (IQR, 3-17)                                                    | 0.293                                          |
| Cardiovascular       | 7 (IQR, 3-14)                                 | 2 (IQR, 0-11.25)                                  | 8 (IQR 5-15)                                                      | 0.027*                                         |
| Other                | 7 (IQR, 3-21.5)                               | 7 (IQR, 2.75-19)                                  | 8 (IQR 3-23.5)                                                    | 0.82                                           |
| Combination          | 7 (IQR, 3-11)                                 | -                                                 | 7 (IQR 3-11)                                                      | -                                              |

\*statistically significant

**Table 2:** Trend analysis 2010-2019 - causes of deaths in secondary palliative and curative treatment concept

|                | EST* overall    |                   |                            |          |             | Secondary palliative EST* |                   |                |          |             | Curative EST*              |                   |                            |          |             |
|----------------|-----------------|-------------------|----------------------------|----------|-------------|---------------------------|-------------------|----------------|----------|-------------|----------------------------|-------------------|----------------------------|----------|-------------|
| Cause of death | Cerebrovascular | Pneumonia, sepsis | Cardiovascular             | Other    | Combination | Cerebrovascular           | Pneumonia, sepsis | Cardiovascular | Other    | Combination | Cerebrovascular            | Pneumonia, sepsis | Cardiovascular             | Other    | Combination |
| P-value        | 0.818           | 0.607             | 0.026                      | 0.423    | 0.721       | 0.141                     | 0.398             | 0.656          | 0.539    | 0.531       | 0.003                      | 0.286             | 0.002                      | 0.627    | -           |
| Trend          | No trend        | No trend          | Lower proportion with time | No trend | No trend    | No trend                  | No trend          | No trend       | No trend | No trend    | Lower proportion with time | No trend          | Lower proportion with time | No trend | -           |

\*\*EST – endovascular stroke therapy = mechanical thrombectomy and/or intra-arterial thrombolysis, in combination or not with intravenous thrombolysis

**Table 3:** Trend analysis 2010-2019 – Baseline characteristics in different treatment groups

|                | EST overall*               |                            |                        |                        | Secondary palliative         |                        |                        |             | Curative    |             |                        |             |
|----------------|----------------------------|----------------------------|------------------------|------------------------|------------------------------|------------------------|------------------------|-------------|-------------|-------------|------------------------|-------------|
| Characteristic | Age                        | NIHSS**                    | mRS at admission***    | LOS****                | Age                          | NIHSS                  | mRS                    | LOS         | Age         | NIHSS       | mRS at admission       | LOS         |
| P-value        | <0.001                     | <0.001                     | <0.001                 | <0.001                 | 0.069                        | <0.001                 | <0.001                 | 0.738       | 0.898       | 0.809       | 0.028                  | 0.698       |
| Trend          | Increase<br>s with<br>time | Decrease<br>s with<br>time | Decreases<br>with time | Decreases<br>with time | Increases<br>es with<br>time | Decreases<br>with time | Decreases<br>with time | No<br>trend | No<br>trend | No<br>trend | Decreases<br>with time | No<br>trend |

\* EST – endovascular stroke therapy = mechanical thrombectomy and/or intra-arterial thrombolysis, in combination or not with intravenous thrombolysis

\*\*National Institutes of Health Stroke Scale

\*\*\*Modified Rankin Scale

\*\*\*\*Length of stay

**Table 4:** Direct comparison between 2010/11 and 2019 – causes of death and reasons for palliation

| Year       | Cause of death/reason for palliation | Curative treatment group | Secondary palliative treatment group |
|------------|--------------------------------------|--------------------------|--------------------------------------|
|            |                                      | Cause of death n/N       | Reason for palliation n/N            |
| 2010, 2011 | Cerebrovascular                      | 2/3                      | 13/16                                |
|            | Pneumonia, sepsis                    | 0/3                      | 1/16                                 |
|            | Cardiovascular                       | 1/3                      | 0/16                                 |
|            | Other                                | 0/3                      | 0/16                                 |
|            | Combination                          | 0/3                      | 3/16                                 |
| 2019       | Cerebrovascular                      | 1/3                      | 32/46                                |
|            | Pneumonia, sepsis                    | 1/3                      | 3/46                                 |
|            | Cardiovascular                       | 0/3                      | 3/46                                 |
|            | Other                                | 1/3                      | 3/46                                 |
|            | Combination                          | 0/3                      | 5/46                                 |
|            | Cause of death/reason for palliation | Compared p-value         | Compared p-value                     |

|  |                   | Curative treatment group<br>2010/11 versus 2019 | Secondary palliative treatment group<br>2010/11 versus 2019 |
|--|-------------------|-------------------------------------------------|-------------------------------------------------------------|
|  | Cerebrovascular   | 0.414                                           | 0.680                                                       |
|  | Pneumonia, sepsis | 0.273                                           | 0.970                                                       |
|  | Cardiovascular    | 0.273                                           | 0.295                                                       |
|  | Other             | 0.273                                           | 0.295                                                       |
|  | Combination       | Not calculable                                  | 0.418                                                       |
